# Supplementary material for: Breast cancer-induced immune suppression in the sentinel lymph node is effectively countered by CpG-B in conjunction with inhibition of the JAK2/STAT3 pathway
Source: PubMed Central journal article supplement — J Immunother Cancer. 2020 Oct 12;8(2):e000761. doi: 10.1136/jitc-2020-000761 (PMC7552844; doi:10.1136/jitc-2020-000761), 2020-10-12
Supplement: jitc-2020-000761supp001.pdf [file jitc-2020-000761supp001.pdf]

Supplementary File 1: Table S1. Overview of performed experiments and clinicopathological characteristics per patient

| Patient | Experiments performed   |              |              |                             |       |                                |                                                      | Clinicopathological characteristics |     |                         |              |             |                 |     |     |                |
|---------|-------------------------|--------------|--------------|-----------------------------|-------|--------------------------------|------------------------------------------------------|-------------------------------------|-----|-------------------------|--------------|-------------|-----------------|-----|-----|----------------|
|         | DC subset FACS analyses |              |              | CBA                         |       | Intracellular T cell cytokines | IFN $\gamma$ ELISPOT (+ T cell subset FACS analyses) | pSTAT3 FACS analyses                | Age | Primary tumor size (cm) | Histology    | Grade (BR*) | Receptor status |     |     | SLN metastasis |
|         | post-culture            |              | pre-culture  | cytokine/chemokine analyses |       |                                |                                                      |                                     |     |                         |              |             | HER2+           | ER+ | PR+ |                |
|         | day 2                   | day 7        |              | day 2                       | day 7 |                                |                                                      |                                     |     |                         |              |             |                 |     |     |                |
| 1       | X (no C3)               |              | X            |                             |       |                                |                                                      |                                     | 55  | 2.5                     | ductal       | 2           | no              | yes | yes | yes (macro)    |
| 2       | X (no C3)               |              | X            |                             |       |                                |                                                      |                                     | 89  | 0.2                     | ductal       | 1           | no              | yes | no  | no             |
| 3       | X (cDC only)            |              | X (cDC only) | X                           |       |                                |                                                      |                                     | 65  | 1.5                     | mucinous     | 2           | no              | yes | yes | no             |
| 4       | X                       |              |              | X                           |       |                                |                                                      |                                     | 52  | 1.4                     | ductal       | 3           | no              | yes | yes | yes (macro)    |
| 5       | X                       |              | X            | X                           |       |                                |                                                      |                                     | 62  | 1.3                     | ductal       | 1           | no              | yes | yes | no             |
| 6       | X                       |              | X            | X                           |       |                                |                                                      |                                     | 62  | 5                       | ductal       | 3           | no              | yes | yes | no             |
| 7       | X (pDC only)            | X (pDC only) | X (pDC only) | X                           |       | X                              |                                                      |                                     | 66  | 2                       | ductal       | 2           | no              | no  | no  | no             |
| 8       | X (CD83 only)           |              |              |                             |       |                                |                                                      |                                     | 52  | 1.2                     | ductal       | 2           | yes             | no  | no  | no             |
| 9       | X (CD83 only)           |              | X            |                             |       |                                |                                                      |                                     | 66  | 1.9                     | ductal       | 1           | no              | yes | no  | no             |
| 10      | X (CD83 only)           |              | X            |                             |       |                                |                                                      |                                     | 66  | 1.5                     | ductal       | 1           | no              | yes | yes | no             |
| 11      |                         | X (cDC only) | X (cDC only) | X                           | X     |                                |                                                      |                                     | 55  | 2.3                     | ductal       | 3           | no              | no  | no  | yes (macro)    |
| 12      |                         | X            | X (cDC only) | X                           | X     |                                |                                                      |                                     | 46  | 1.5                     | ductal       | 2           | no              | yes | yes | no             |
| 13      |                         | X            | X            | X                           | X     |                                |                                                      |                                     | 64  | 1.3                     | ductal       | 3           | yes             | no  | no  | no             |
| 14      |                         | X            | X            | X                           | X     |                                |                                                      |                                     | 56  | 1.3                     | ductal       | 1           | no              | yes | yes | yes (macro)    |
| 15      |                         | X            | X            | X                           | X     |                                |                                                      |                                     | 64  | 1                       | ductal       | 3           | yes             | no  | no  | no             |
| 16      |                         | X            | X            | X                           | X     |                                |                                                      |                                     | 74  | 3                       | ductal       | 1           | no              | yes | yes | no             |
| 17      |                         |              |              |                             |       |                                | X                                                    |                                     | 49  | 1.3                     | ductal       | 2           | no              | yes | yes | no             |
| 18      |                         |              |              |                             |       |                                | X (+)                                                |                                     | 52  | 1.5                     | lobular      | 2           | no              | yes | yes | no             |
| 19      |                         |              |              |                             |       |                                | X                                                    |                                     | 52  | 1.5                     | lobular      | 2           | no              | yes | yes | no             |
| 20      |                         |              |              |                             |       | X                              | X (+)                                                |                                     | 73  | 1.5                     | lobular      | 2           | no              | yes | yes | no             |
| 21      |                         |              |              |                             |       |                                | X (+)                                                |                                     | 73  | 1.2                     | ductal       | 3           | no              | yes | yes | no             |
| 22      |                         |              |              |                             |       | X                              |                                                      |                                     | 53  | 2.5                     | ductal       | 3           | no              | yes | yes | no             |
| 23      |                         |              |              |                             |       |                                | X (+)                                                |                                     | 53  | 2.5                     | ductal       | 3           | no              | yes | yes | no             |
| 24      |                         |              |              |                             |       | X                              | X (+)                                                |                                     | 56  | 1.7                     | ductal       | 2           | no              | yes | yes | no             |
| 25      |                         |              |              |                             |       | X                              | X (+)                                                |                                     | 52  | 3                       | mucinous     | 2           | no              | yes | yes | yes (micro)    |
| 26      |                         |              |              |                             |       |                                | X                                                    |                                     | 57  | 1                       | ductolobular | 1           | no              | yes | yes | no             |
| 27      |                         |              |              |                             |       |                                |                                                      | X                                   | 52  | 1                       | ductal       | 2           | no              | yes | yes | no             |
| 28      |                         |              |              |                             |       |                                |                                                      | X                                   | 63  | 1.3                     | papillary    | 2           | no              | yes | yes | no             |
| 29      |                         |              |              |                             |       |                                |                                                      | X                                   | 41  | 1.3                     | ductal       | 1           | no              | yes | yes | no             |

\*Bloom Richardson (BR)
