# Supplementary material for: Breast cancer-induced immune suppression in the sentinel lymph node is effectively countered by CpG-B in conjunction with inhibition of the JAK2/STAT3 pathway
Source: PubMed Central journal article supplement — J Immunother Cancer. 2020 Oct 12;8(2):e000761. doi: 10.1136/jitc-2020-000761 (PMC7552844; doi:10.1136/jitc-2020-000761), 2020-10-12
Supplement: jitc-2020-000761supp002.pdf [file jitc-2020-000761supp002.pdf]

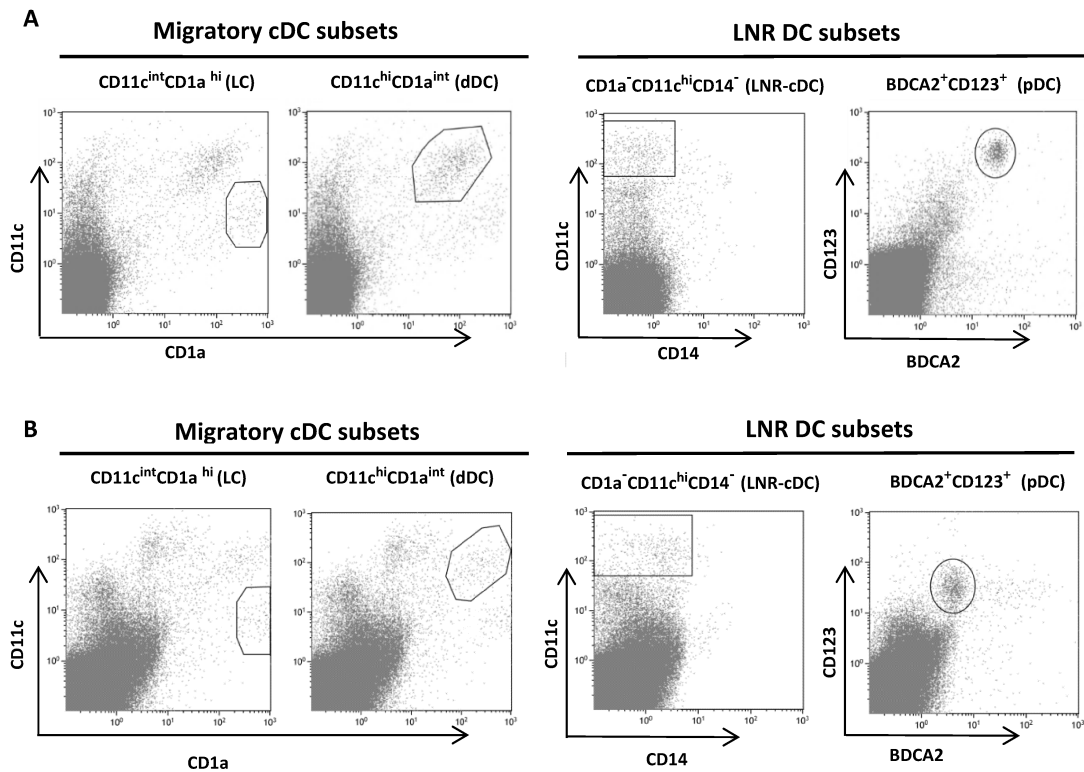

**Supplementary File 2: Figure S1. DC subset gating strategies pre and post SLN single-cell culture**

Shown are the gating strategies of DC subsets (A) pre-culture and (B) post-culture. FSC/SSC viability gating was used to gate viable leukocytes, excluding dead cells, granulocytes and debris. The left columns show the gating strategy of the two migratory (CD1a+) conventional DC subsets: CD11c<sup>int</sup>CD1a<sup>hi</sup> (LC) and CD11c<sup>hi</sup>CD1a<sup>int</sup> (dDC). The right columns show the gating strategy of the two LNR DC subsets: the CD11c<sup>+</sup>CD14<sup>-</sup> LNR conventional DC subset (LNR-cDC), pre-gated to exclude CD1a+ cells and the BDCA2<sup>+</sup>CD123<sup>+</sup> plasmacytoid DC (pDC) subset.
