# Supplementary material for: Breast cancer-induced immune suppression in the sentinel lymph node is effectively countered by CpG-B in conjunction with inhibition of the JAK2/STAT3 pathway
Source: PubMed Central journal article supplement — J Immunother Cancer. 2020 Oct 12;8(2):e000761. doi: 10.1136/jitc-2020-000761 (PMC7552844; doi:10.1136/jitc-2020-000761), 2020-10-12
Supplement: jitc-2020-000761supp003.pdf [file jitc-2020-000761supp003.pdf]

Supplementary File 3: Table S2. Phenotype of immune cell subsets

| LN cell subset                  | Phenotype                                                                |
|---------------------------------|--------------------------------------------------------------------------|
| <b>DC subsets</b>               |                                                                          |
| Migratory conventional DC (cDC) |                                                                          |
| dermal DC (dDC)                 | CD1a <sup>+</sup> CD11c <sup>hi</sup> CD1a <sup>int</sup>                |
| Langerhans Cells (LC)           | CD1a <sup>+</sup> CD11c <sup>int</sup> CD1a <sup>hi</sup>                |
|                                 | <i>dDC and LC<br/>maturation/activation<br/>markers:<br/>CD83, CD86</i>  |
| Lymph node resident DC          |                                                                          |
| LNR conventional DC (LNR-cDC)   | CD1a <sup>-</sup> CD11c <sup>+</sup> CD14 <sup>-</sup>                   |
|                                 | <i>maturation/activation<br/>markers:<br/>CD83, CD86</i>                 |
| plasmacytoid DC (pDC)           | CD123 <sup>+</sup> BDCA2 <sup>+</sup>                                    |
|                                 | <i>maturation/activation<br/>markers:<br/>CD83, CD40</i>                 |
| <b>T cells</b>                  |                                                                          |
| CD4 <sup>+</sup> T cells        | CD3 <sup>+</sup> CD4 <sup>+</sup> CD8 <sup>-</sup>                       |
| CD8 <sup>+</sup> T cells        | CD3 <sup>+</sup> CD4 <sup>-</sup> CD8 <sup>+</sup>                       |
| Regulatory T cells (Treg)       | CD3 <sup>+</sup> CD4 <sup>+</sup> CD25 <sup>hi</sup> Foxp3 <sup>hi</sup> |
