# Supplementary material for: Breast cancer-induced immune suppression in the sentinel lymph node is effectively countered by CpG-B in conjunction with inhibition of the JAK2/STAT3 pathway
Source: PubMed Central journal article supplement — J Immunother Cancer. 2020 Oct 12;8(2):e000761. doi: 10.1136/jitc-2020-000761 (PMC7552844; doi:10.1136/jitc-2020-000761), 2020-10-12
Supplement: jitc-2020-000761supp004.pdf [file jitc-2020-000761supp004.pdf]

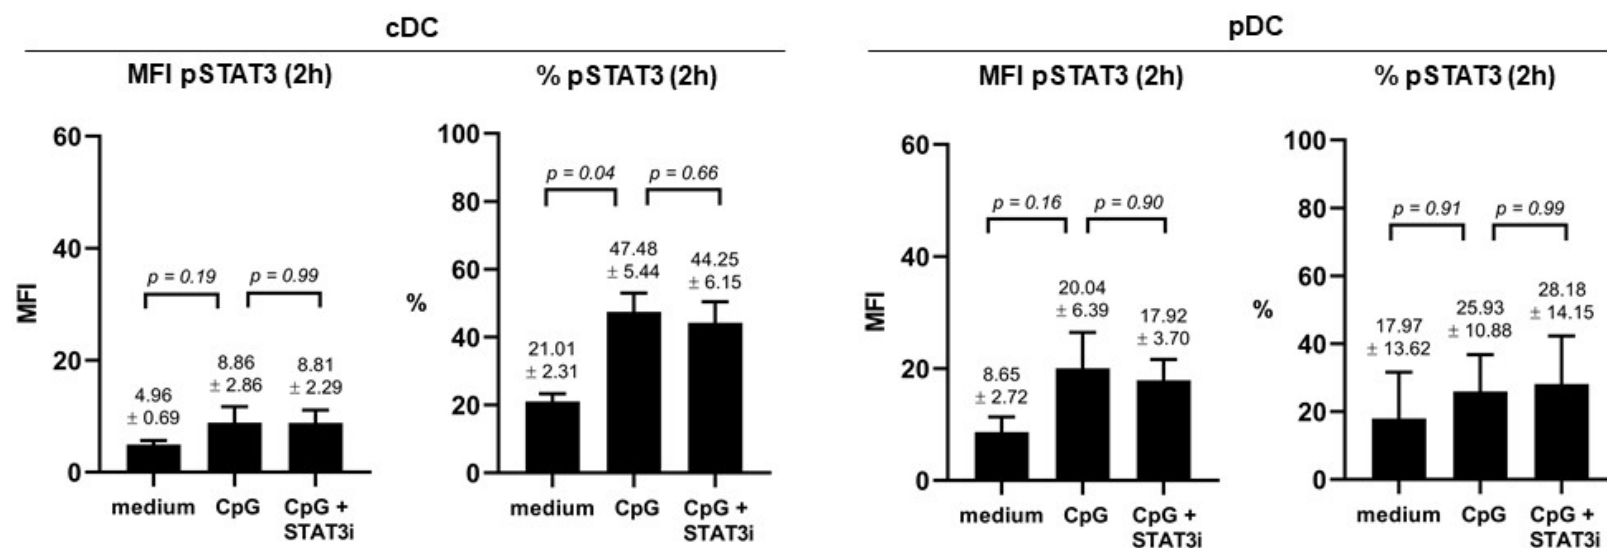

**Supplementary File 4: Figure S2. pSTAT3 levels of conventional dendritic cells (cDC) and pDC in BrC SLN negative BrC SLN cell samples, after 2h culture with medium, CpG or CpG + AG490 (STAT3i)**

Phosphorylated STAT3 (pSTAT3) levels (assessed by flow cytometric analysis) in the conventional DC population (phenotypically characterized by shared CD11c<sup>hi</sup>) and the pDC subset measured in metastasis negative BrC SLN cell samples, cultured for 2h with medium, CpG or CpG + AG490 (STAT3i). MFI of pSTAT3 and percentage pSTAT3 positive cells (both at 2h of culture) of cDCs (left bar graphs) and the pDCs (right bar graphs) in 3 individual BrC SLN cell samples (n=3) are shown. Bars represent mean with SEM, with mean pSTAT3 levels (±SEM) of each culture condition and corresponding p-values displayed above the error bars.
