# Supplementary material for: Breast cancer-induced immune suppression in the sentinel lymph node is effectively countered by CpG-B in conjunction with inhibition of the JAK2/STAT3 pathway
Source: PubMed Central journal article supplement — J Immunother Cancer. 2020 Oct 12;8(2):e000761. doi: 10.1136/jitc-2020-000761 (PMC7552844; doi:10.1136/jitc-2020-000761), 2020-10-12
Supplement: jitc-2020-000761supp005.pdf [file jitc-2020-000761supp005.pdf]

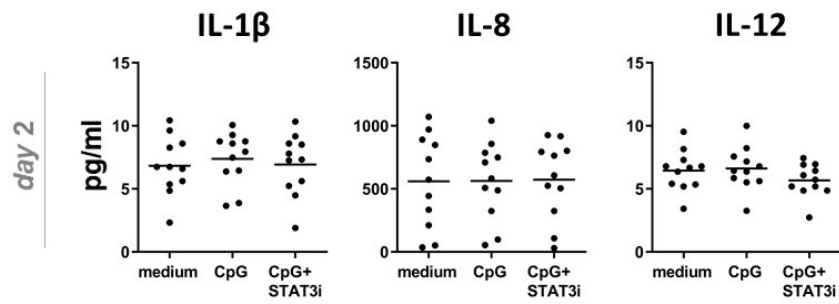

Supplementary File 5: Figure S3. IL-1 $\beta$ , IL-8 and IL-12 cytokine content in BrC SLN cell samples at day 2 of culture

IL-1 $\beta$ , IL-8 and IL-12 cytokine levels (pg/ml) in supernatants of medium, CpG and CpG+STAT3i conditioned BrC SLN cell suspensions. Dots represent cumulative inflammatory cytokine levels measured in individual BrC SLN cell samples after 2 days of culture (n=11) and means are shown.
