# Supplementary material for: Breast cancer-induced immune suppression in the sentinel lymph node is effectively countered by CpG-B in conjunction with inhibition of the JAK2/STAT3 pathway
Source: PubMed Central journal article supplement — J Immunother Cancer. 2020 Oct 12;8(2):e000761. doi: 10.1136/jitc-2020-000761 (PMC7552844; doi:10.1136/jitc-2020-000761), 2020-10-12
Supplement: jitc-2020-000761supp006.pdf [file jitc-2020-000761supp006.pdf]

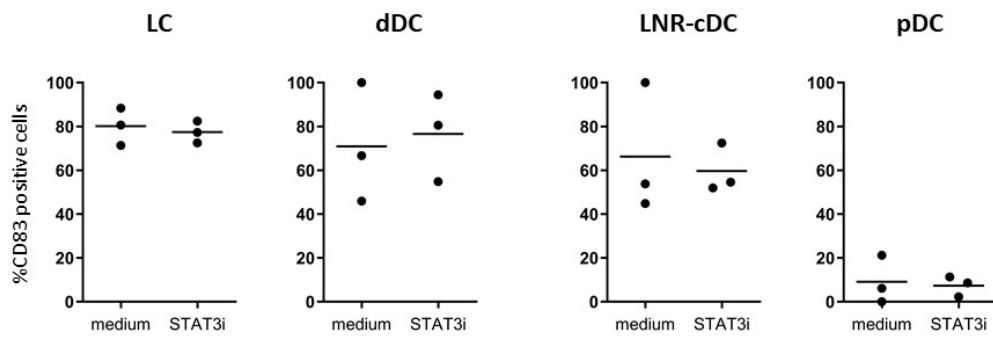

**Supplementary File 6: Figure S4. DC subset CD83 expression in STAT3i treated versus medium control BrC SLN samples**

Results of our own unpublished data in a small separate cohort of 3 metastasis free BrC SLN (not part of the cohort described in this paper), comparing CD83 expression level across DC subsets in STAT3i treated samples to medium control samples. CD83 expression level is expressed as percentage of positive cells within each subset. Bars represent means
