# Supplementary material for: Breast cancer-induced immune suppression in the sentinel lymph node is effectively countered by CpG-B in conjunction with inhibition of the JAK2/STAT3 pathway
Source: PubMed Central journal article supplement — J Immunother Cancer. 2020 Oct 12;8(2):e000761. doi: 10.1136/jitc-2020-000761 (PMC7552844; doi:10.1136/jitc-2020-000761), 2020-10-12
Supplement: jitc-2020-000761supp007.pdf [file jitc-2020-000761supp007.pdf]

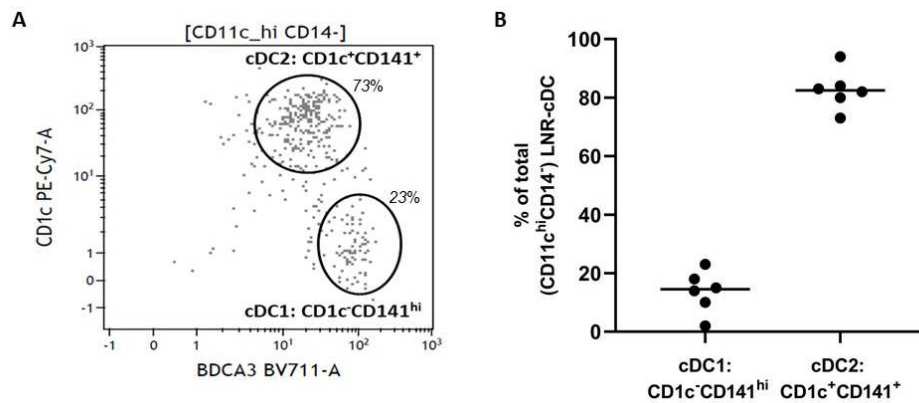

**Supplementary File 7: Figure S5. CD1c and CD141 expression within the CD11c<sup>hi</sup>CD14<sup>-</sup> LNR-cDC population**

Results of multicolor FACS-analyses (encompassing 10-15 markers) of a separate cohort of BrC SLN samples (not part of the cohort described in this paper) analyzing CD1c and CD141 (i.e. BDCA3) expression within the (CD11c<sup>hi</sup>CD14<sup>-</sup>) LNR-cDC subset. (A) representative example of FACS dot plot and gating strategy of the CD1c<sup>+</sup>CD141<sup>hi</sup> cDC1-like cells and the CD1c<sup>+</sup>CD141<sup>+</sup> cDC2-like cells. (B) percentage of CD1c<sup>+</sup>CD141<sup>hi</sup> cDC1-like cells and CD1c<sup>+</sup>CD141<sup>+</sup> cDC2-like cells within the LNR-cDC subset in BrC SLN cell samples (N=6), bars represent means.
