# Supplementary material for: Breast cancer-induced immune suppression in the sentinel lymph node is effectively countered by CpG-B in conjunction with inhibition of the JAK2/STAT3 pathway
Source: PubMed Central journal article supplement — J Immunother Cancer. 2020 Oct 12;8(2):e000761. doi: 10.1136/jitc-2020-000761 (PMC7552844; doi:10.1136/jitc-2020-000761), 2020-10-12
Supplement: jitc-2020-000761supp008.pdf [file jitc-2020-000761supp008.pdf]

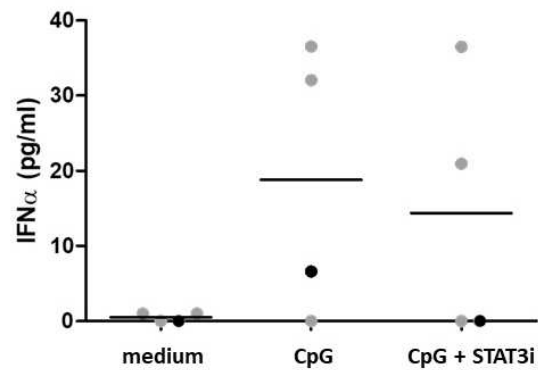

**Supplementary File 8: Figure S6. IFN $\alpha$  levels in day 2 supernatants of medium and CpG  $\pm$  STAT3i treated BrC SLN cell samples**

Results of IFN $\alpha$  levels (pg/ml) measured in supernatants of BrC SLN cell samples from a separate cohort of four BrC SLNs, not part of the cohort described in this paper. Grey dots represent metastasis free SLN (n=3) and black dots represent metastasis positive SLN (n=1). Bars represent means.

Human IFN $\alpha$  platinum enzyme-linked immunosorbent (ELISA) kit (catalog number BMS216CE;eBioscience) was used to determine IFN $\alpha$  levels after in vitro stimulation. Limit of detection was 3.2 pg/ml. 100 $\mu$ l undiluted supernatants were thawed and used for the experiment. The Synergy HT spectro-photometer was used to read the plate. Calculations in order to determine IFN $\alpha$  concentrations were done using the standard curve.
