# Supplementary material for: Breast cancer-induced immune suppression in the sentinel lymph node is effectively countered by CpG-B in conjunction with inhibition of the JAK2/STAT3 pathway
Source: PubMed Central journal article supplement — J Immunother Cancer. 2020 Oct 12;8(2):e000761. doi: 10.1136/jitc-2020-000761 (PMC7552844; doi:10.1136/jitc-2020-000761), 2020-10-12
Supplement: jitc-2020-000761supp009.pdf [file jitc-2020-000761supp009.pdf]

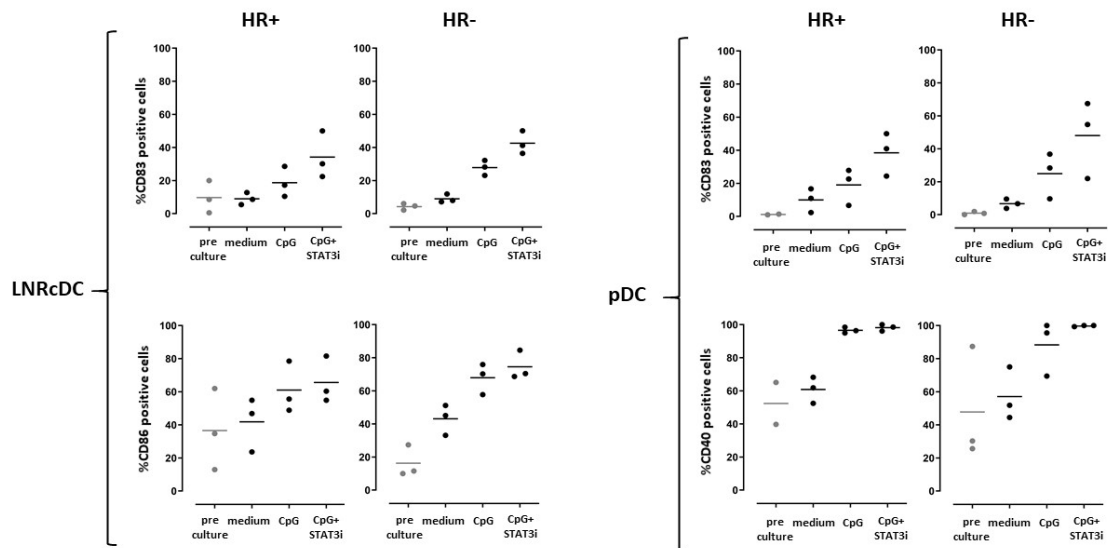

**Supplementary File 9: Figure S7. Activation and maturation state of LNR DC subsets in hormone receptor positive and negative BrC SLN after CpG +/- STAT3i administration**

Shown are expression levels of maturation/activation markers of the lymph node resident (LNR) cDC and pDC subset in medium control and CpG +/- STAT3i conditioned BrC SLN samples (at day 7 of culture) comparing SLN samples derived from hormone receptor positive (HR+, n=3) and hormone receptor negative (HR-, n=3) breast cancers. Corresponding pre-culture data are displayed in grey dots. Bars represent means.
